# Supplementary material
Source: PubMed Central journal article supplement (PMC3963567)
Supplement: supp_tpc.113.120626_tpc120626Supplemental.pdf [file supp_tpc.113.120626_tpc120626Supplemental.pdf]

**Supplemental Figure 1 - Distribution of phenotype trait values in the Syn x Nat F2 population.**

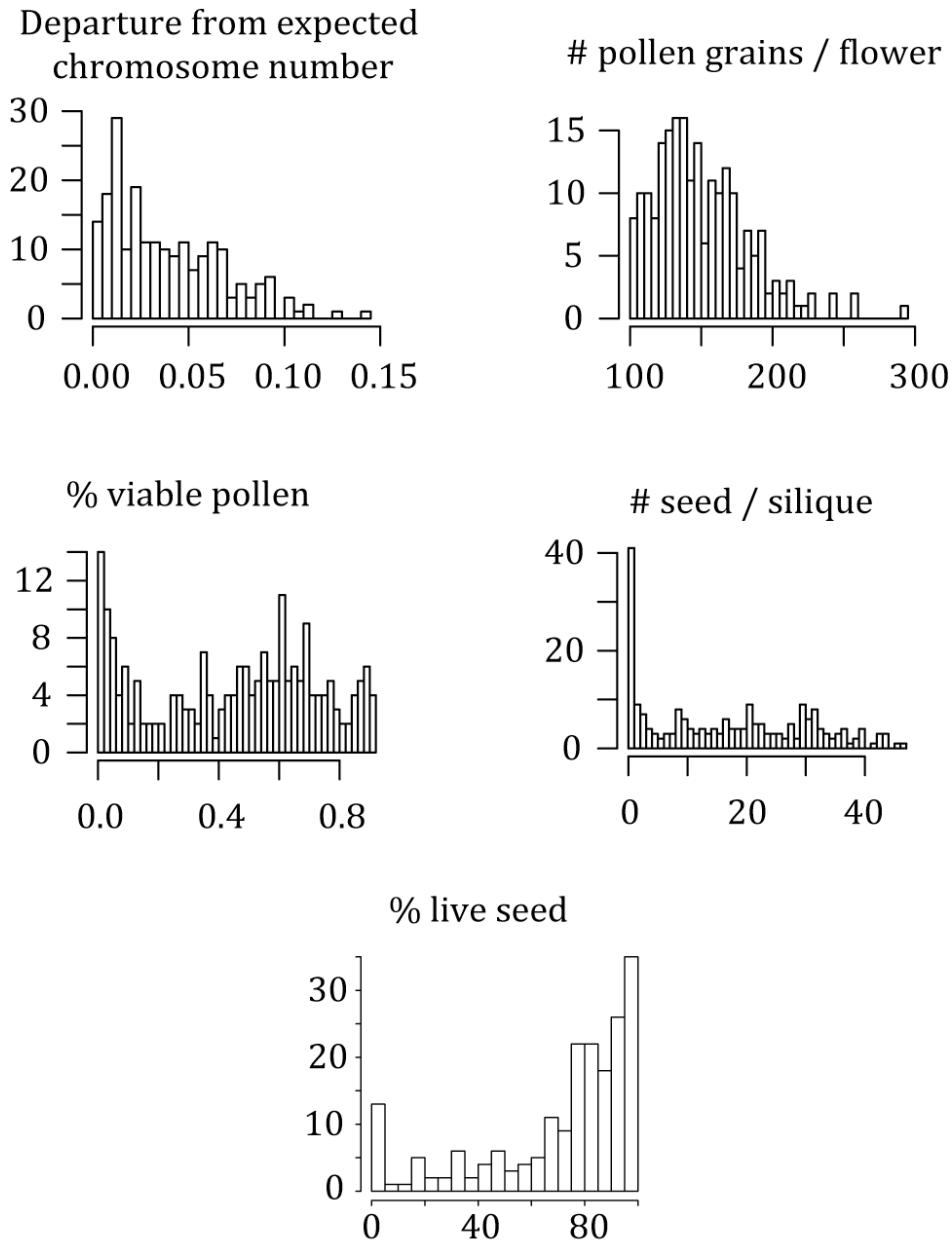

**Supplemental Figure 2 – Correlation between the different fertility-related traits in the Syn x Nat F2 population.**

For continuous traits, regression p-values and  $R^2$  values for significant regressions (p-values < 0.01) are indicated. For binary traits, the mean value for the second trait is plotted (bars), standard errors are indicated and significant means are indicated ("\*" and "\*\*" if the t-test p-value < 0.05 and 0.01 respectively).

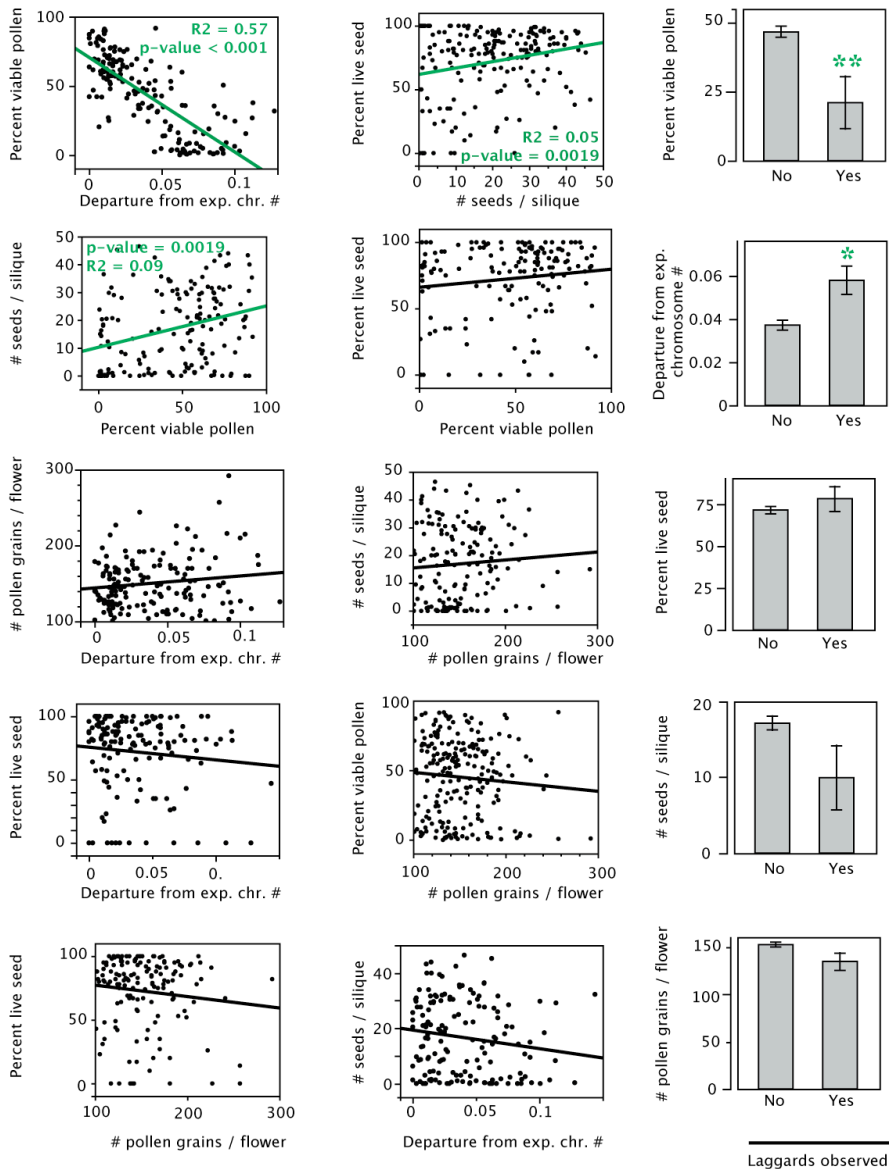

**Supplemental Figure 3 – Mapping of parental reads to the hybrid reference genome.**

Percentage of sequencing reads preferentially mapping to a single position on the *A. thaliana* or the *A. lyrata* reference, mapping to more than one position (“Repeated”) or not mapping (“Unmapped”). For uniquely mapped reads, percentages are further divided according the number of mismatches between the sequencing read and the reference sequence (between zero and five).

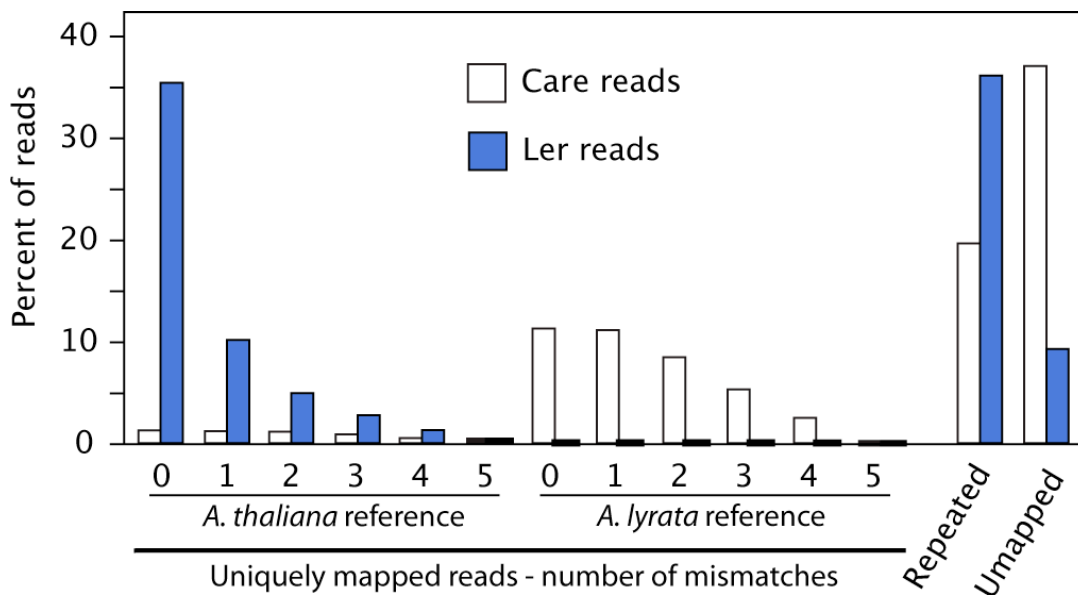

**Supplemental Figure 4 – Karyotype of the individuals exhibiting dosage variation in the selfed progeny of *A. suecica* accessions.**

A dosage plot was obtained for each individual from whole genome sequencing data. Sequencing reads were aligned to the reference genome and sorted into consecutive bins along the 13 chromosomes of the allopolyploid genome. For ease of visualization, relative read coverage is normalized such that fragments present in two copies fluctuate around 2.0. Changes up or down in relative coverage of consecutive bins indicates variation in dosage and correspond to the addition or deletion of a particular chromosome or chromosomal fragment, respectively. Relative coverage around the centromeric repeats consistently appears noisy most likely because of mis-mapping and poor quality of reference sequence.

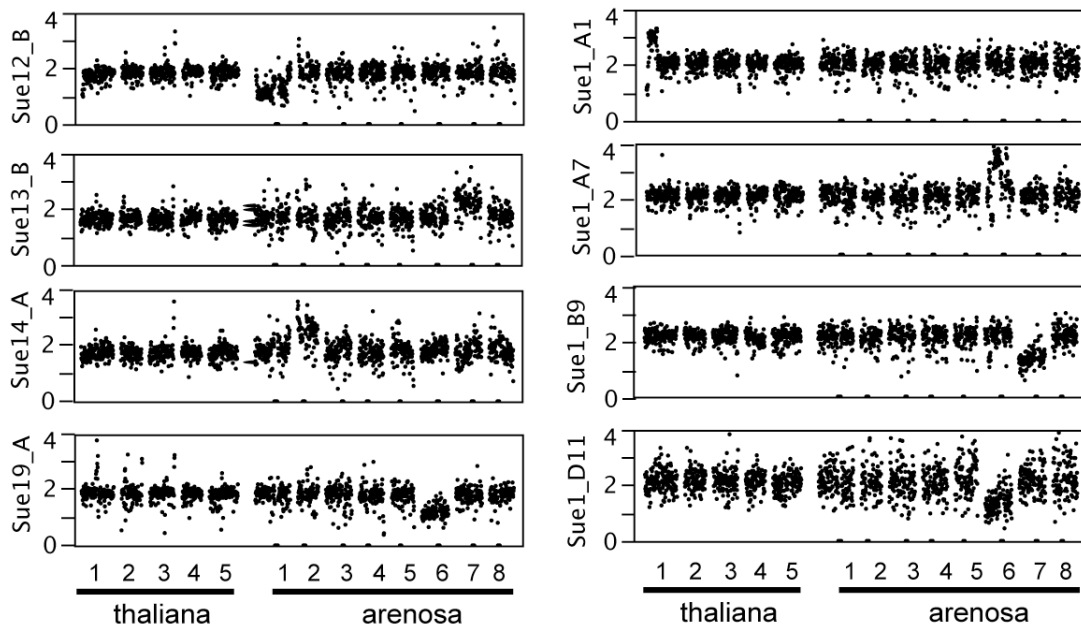

**Supplemental Figure 5 – Karyotype of the individuals exhibiting dosage variation in the selfed progeny of synthetic allopolyploids (Syn) individuals**

A dosage plot was obtained for each individual from whole genome sequencing data. Sequencing reads were aligned to the reference genome and sorted into consecutive bins along the 13 chromosomes of the allopolyploid genome. For ease of visualization, relative read coverage is normalized such that fragments present in two copies fluctuate around 2.0. Changes up or down in relative coverage of consecutive bins indicates variation in dosage and correspond to the addition or deletion of a particular chromosome or chromosomal fragment, respectively. Relative coverage around the centromeric repeats consistently appears noisy most likely because of mis-mapping and poor quality of reference sequence.

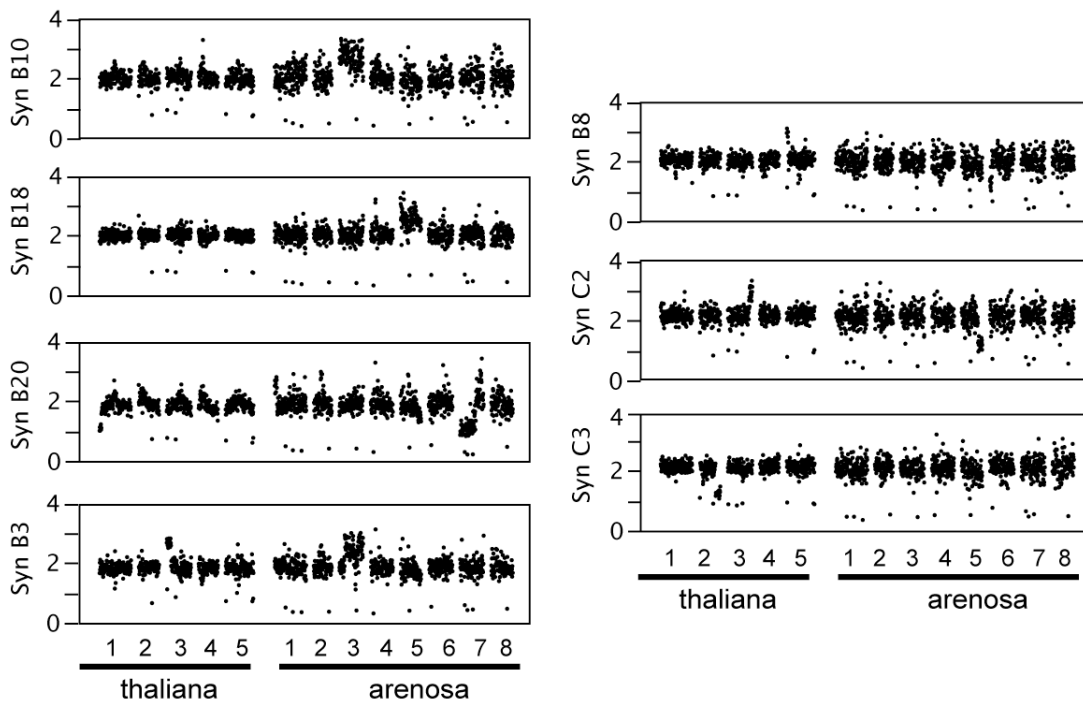

**Supplemental Figure 6 – FISH and karyotyping data are consistent with each other.** Individuals were classified into three categories according to the results of our karyotyping using next-generation sequencing: samples exhibiting one full additional chromosome (trisomics, N = 10), samples missing one full chromosome (monosomics, N = 10) and true diploids (N = 208). The other samples were excluded from this analysis. For each category, the mean value of our measure of meiotic regularity (mean departure from expected chromosome number, see Methods) was calculated. As expected, the monosomics were different from each other and positioned on either side of the true diploids, which exhibited intermediate values. The means were not significantly different for those comparisons. Standard deviations are shown.

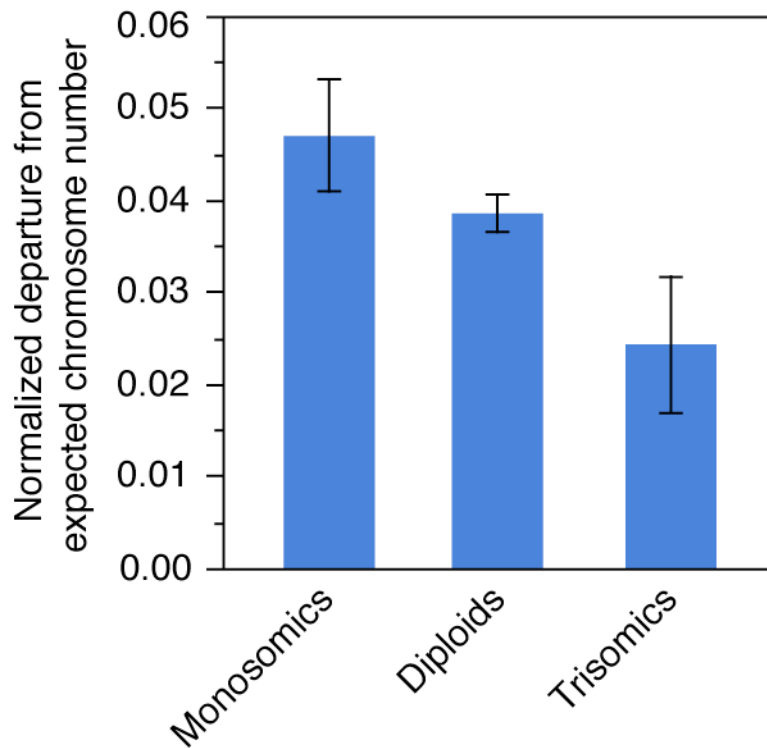

**Supplemental Figure 7 - Genetic map of the Syn x Nat F2 population.**

Distances are represented in centimorgans (cM).

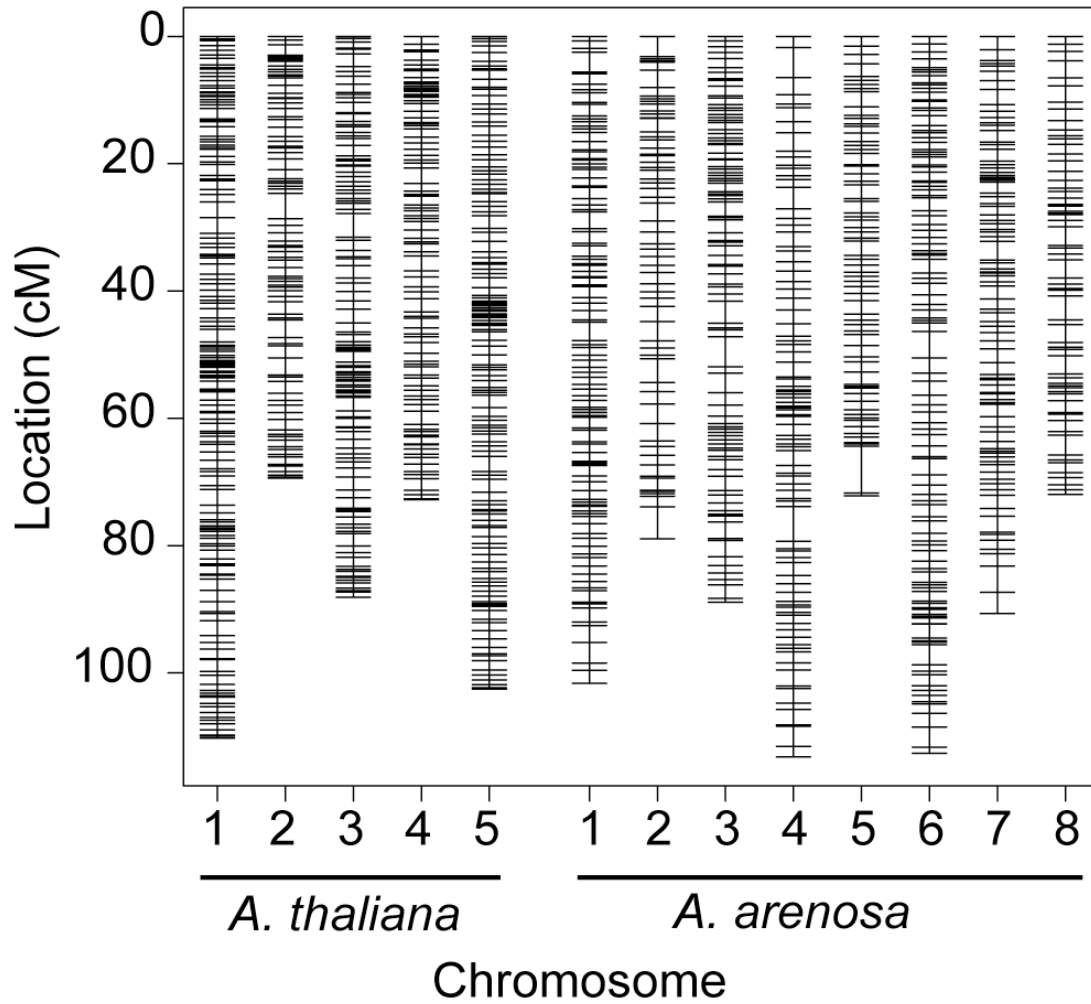

**Supplemental Figure 8 – Pairwise recombination frequencies between marker bins.**

Continuous color scale, in which red indicates pairs of marker bin that are linked and blue indicated that they are unlinked.

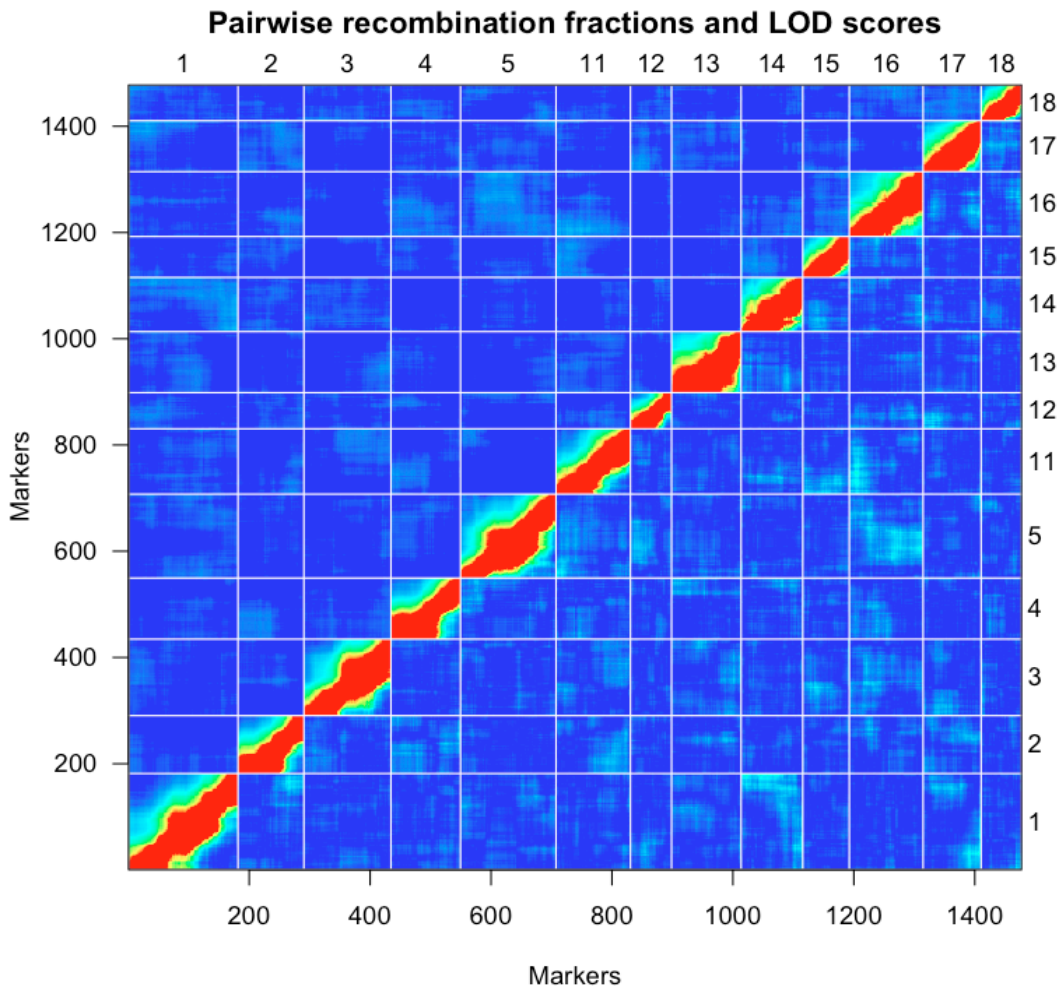



**Supplemental Figure 9 – Result of QTL mapping for all traits analyzed.**

Results of QTL detection using standard interval mapping in R/qtl. LOD scores are plotted along the five *A. thaliana* and the eight *A. arenosa* chromosomes. Significance thresholds were determined based on 1,000 permutations and correspond to p-values < 0.05.

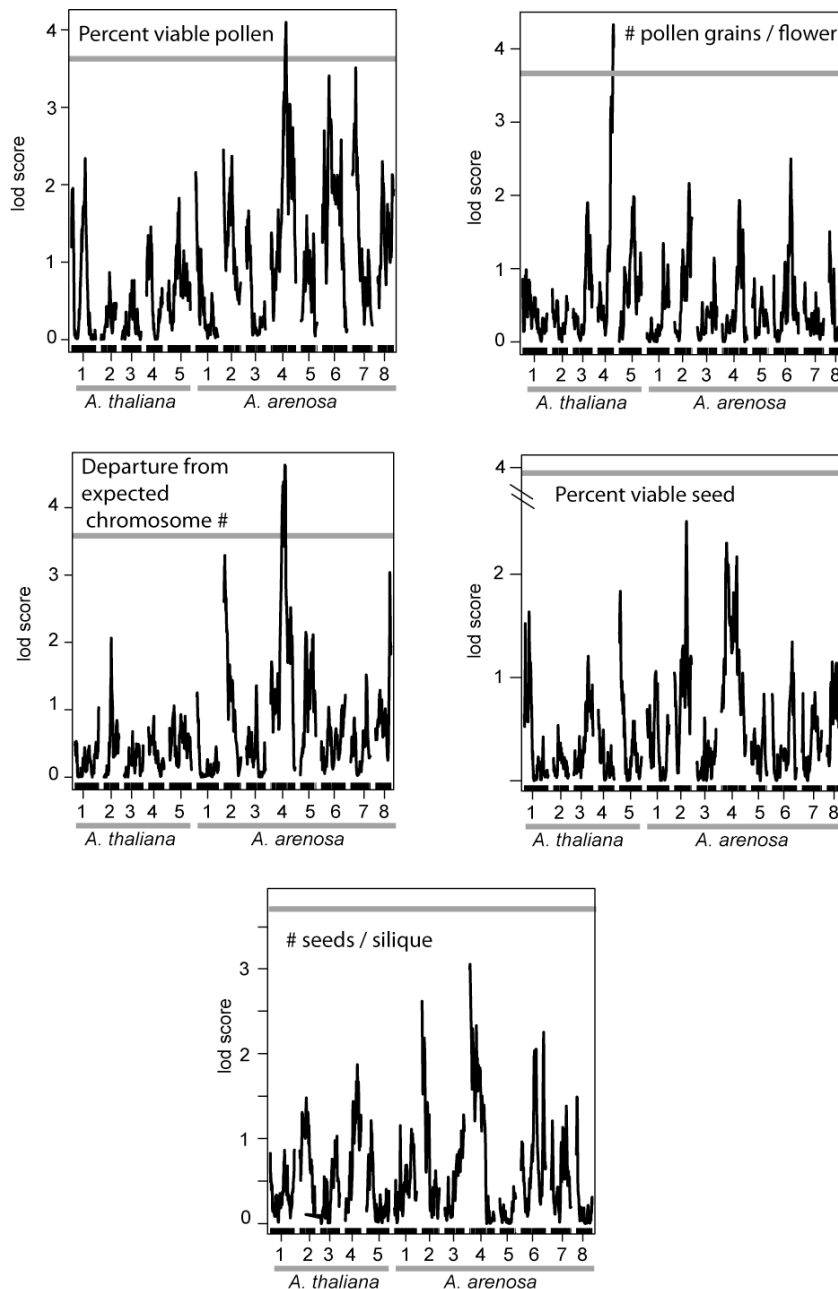

**Supplemental Table 1 – List of sequencing barcodes used for library demultiplexing.**

Each column represents one lane of Illumina sequencing.

| #  | Barcode seq. | SueSyn1       | SueSyn2       | P 1        | P2        | F2_1 | F2_2 | F2_3 | F2_4 | F2_5 | P3        | P4    |
|----|--------------|---------------|---------------|------------|-----------|------|------|------|------|------|-----------|-------|
| 1  | AAACA        | Sue-13A       | Sue1_A_2<br>3 | Care-<br>1 |           |      | 284  | 599  | 14   | 225  |           |       |
| 2  | AAATC        | Sue-13B       | Sue1_B_9      |            | Sue-<br>1 |      | 504  | 246  | 513  | 261  |           |       |
| 3  | AACAT        | Sue-13C       | Sue-12A       | Ler-1      |           |      | 574  | 285  | 642  | 362  |           |       |
| 4  | AAGAG        | Sue-13D       | Sue1_D_1<br>2 |            |           | 212  | 506  | 201  | 348  | 103  |           |       |
| 5  | AAGCC        | Sue-13E       | Syn-A1        |            |           | 586  | 287  | 376  | 176  | 188  |           |       |
| 6  | AAGTT        | Sue-13F       | Syn-F20       |            |           | 505  | 524  | 158  | 527  | 146  | Ler       |       |
| 7  | AATGC        | Sue-13G       | Sue1_B_6      |            |           | 620  | 155  | 352  | 567  | 35   |           |       |
| 8  | ACACT        | Sue-14A       | Sue1_B_7      |            |           | 294  | 646  | 589  | 604  | 76   |           | Sue-1 |
| 9  | ACCCC        | Sue-14B       | Sue1_B_8      |            |           | 516  | 309  | 375  | 95   | 152  |           |       |
| 10 | ACCGG        | Sue-14C       | Sue1_D_1<br>1 |            |           | 109  | 18   | 200  | 189  | 300  |           |       |
| 11 | ACGCA        | Sue-14D       | Syn-C8        |            |           | 314  | 600  | 78   | 248  | 159  |           |       |
| 12 | ACGTG        | Sue-14E       | Syn-C9        |            |           | 221  | 32   | 274  | 370  | 242  |           |       |
| 13 | ACTAA        | Sue-14F       | Syn-F12       |            |           | 306  | 174  | 163  | 51   | 47   |           |       |
| 14 | ACTCG        | Sue-14G       | Syn-F14       |            |           | 552  | 577  | 85   | 71   | 10   |           |       |
| 15 | ACTGT        | Sue-14H       | Syn-F15       |            |           | 134  | 183  | 643  | 319  | 283  |           |       |
| 16 | AGCGA        | Sue-14I       | Sue1_A_1      |            |           | 514  | 508  | 535  | 167  | 111  |           |       |
| 17 | AGCTT        | Sue-16A       | Sue1_A_1<br>4 |            |           | 539  | 186  | 349  | 213  | 62   |           |       |
| 18 | AGGAC        | Sue-16B       | Sue1_A_1<br>5 |            |           | 340  | 526  | 43   | 553  | 116  |           |       |
| 19 | AGTCA        | Sue-16C       | Sue1_A_1<br>8 |            |           | 545  | 56   | 297  | 17   | 3    |           |       |
| 20 | AGTGG        | Sue-16D       | Sue1_A_2<br>0 |            |           | 624  | 36   | 2    | 122  | 25   |           |       |
| 21 | ATACG        | Sue-16E       | Sue1_A_3      |            |           | 378  | 561  | 517  | 550  | 101  |           |       |
| 22 | ATAGC        | Sue-19A       | Sue1_A_5      |            |           | 289  | 501  | 384  | 120  | 165  | Car<br>e1 |       |
| 23 | ATCAC        | Sue-19C       | Sue1_B_3      |            |           | 573  | 295  | 204  | 45   | 110  |           |       |
| 24 | ATGTA        | Sue-<br>1_18  | Sue1_B_5      |            |           | 559  | 548  | 533  | 223  | 363  |           |       |
| 25 | ATTCC        | Sue-19B       | Sue1_D_2<br>1 |            |           | 582  | 264  | 273  | 19   | 68   |           |       |
| 26 | ATTGA        | Sue1_A_<br>2  | Syn-B18       |            |           | 557  | 555  | 277  | 241  | 22   |           |       |
| 27 | CAAAA        | Sue1_A_<br>8  | Syn-B19       |            |           | 80   | 244  | 154  | 328  | 53   |           |       |
| 28 | CAATT        | Sue1_A_<br>9  | Syn-B20       |            |           | 227  | 562  | 615  | 83   | 325  |           |       |
| 29 | CACCC        | Sue1_A_<br>10 | Sue-12B       |            |           | 610  | 371  | 222  | 9    | 153  |           |       |

Supplemental Data. Henry et al. (2014), Plant Cell 10.1105/tpc.113.120626

|    |       |           |           |  |     |     |     |     |     |        |       |
|----|-------|-----------|-----------|--|-----|-----|-----|-----|-----|--------|-------|
| 30 | CATCT | Sue1_A_11 | Syn-C11   |  | 605 | 293 | 196 | 46  | 40  |        |       |
| 31 | CATTC | Sue1_A_16 | Syn-C12   |  | 618 | 299 | 594 | 347 | 209 |        |       |
| 32 | CCCCA | Sue1_A_19 | Syn-C14   |  | 565 | 255 | 329 | 253 | 301 | Ler    |       |
| 33 | CCCTT | Sue1_D_13 | Syn-F1    |  | 193 | 296 | 141 | 44  | 236 |        |       |
| 34 | CCGAG | Sue1_D_15 | Syn-F10   |  | 317 | 239 | 549 | 645 | 65  |        |       |
| 35 | CGAAT | Sue1_D_16 | Syn-F11   |  | 580 | 547 | 119 | 366 | 138 |        |       |
| 36 | CGAGG | Sue1_D_17 | Syn-F13   |  | 609 | 616 | 139 | 156 | 67  |        |       |
| 37 | CGATC | Sue1_D_20 | Syn-F17   |  | 131 | 621 | 522 | 333 | 206 |        |       |
| 38 | CGCAC | Sue1_D_22 | Syn-F19   |  | 518 | 57  | 585 | 102 | 50  |        | Sue-1 |
| 39 | CGCGT | Sue1_D_23 | Syn-F2    |  | 543 | 54  | 127 | 566 | 534 |        |       |
| 40 | CGGTT | Sue1_D_24 | Sue-12C   |  | 173 | 560 | 177 | 316 | 96  |        |       |
| 41 | CGTTG |           | Syn-F7    |  | 593 | 596 | 121 | 112 | 237 |        |       |
| 42 | CTAAG |           | Sue1_A_6  |  | 509 | 602 | 313 | 182 | 64  |        |       |
| 43 | CTCGA |           | Syn-F8    |  | 607 | 81  | 94  | 648 | 28  | Car e1 |       |
| 44 | CTCTC |           | Sue1_A_17 |  | 540 | 364 | 354 | 128 | 29  |        |       |
| 45 | CTGCC |           | Sue1_A_21 |  | 268 | 88  | 523 | 619 | 228 |        |       |
| 46 | CTGGT |           | Sue1_A_22 |  | 512 | 178 | 235 | 198 | 147 |        |       |
| 47 | CTTGG |           | Sue1_A_24 |  | 544 | 216 | 611 | 217 | 172 |        |       |
| 48 | GAAGC |           | Sue1_A_4  |  | 263 | 5   | 73  | 575 | 42  |        |       |
| 49 | GACTT |           | Sue1_A_7  |  | 247 | 207 | 568 | 26  | 166 |        |       |
| 50 | GAGCA |           | Sue1_B_1  |  | 308 | 69  | 48  | 262 | 49  |        |       |
| 51 | GATAC |           | Sue1_B_2  |  | 249 | 199 | 368 | 79  | 286 |        |       |
| 52 | GATGA |           | Sue1_D_10 |  | 689 | 292 | 144 | 7   | 130 |        |       |
| 53 | GCAAA |           | Sue1_D_19 |  | 520 | 603 | 266 | 33  | 327 |        |       |
| 54 | GCCAT |           | Syn-B13   |  | 608 | 132 | 187 | 136 | 224 |        |       |
| 55 | GCCTA |           | Syn-B14   |  | 282 | 257 | 350 | 197 | 1   |        |       |
| 56 | GCGTT |           | Syn-B15   |  | 260 | 373 | 233 | 302 | 30  |        |       |
| 57 | GCTCC |           | Syn-B16   |  | 31  | 576 | 175 | 11  | 320 |        |       |
| 58 | GCTGG |           | Syn-B17   |  | 117 | 4   | 612 | 341 | 195 |        |       |
| 59 | GGAAC |           | Syn-B25   |  | 137 | 374 | 626 | 38  | 191 | Ler    |       |
| 60 | GGATG |           | Syn-B3    |  | 541 | 529 | 168 | 635 | 298 | Car e1 |       |
| 61 | GGCAG |           | Syn-B4    |  | 510 | 86  | 135 | 20  | 185 |        |       |
| 62 | GGGAA |           | Syn-C13   |  | 647 | 98  | 105 | 97  | 84  |        |       |
| 63 | GGTGT |           | Syn-F18   |  | 515 | 270 | 305 | 140 | 160 |        |       |
| 64 | GTACC |           | Syn-F5    |  | 591 | 238 | 27  | 55  | 107 |        |       |
| 65 | GTAGT |           | Sue1_A_12 |  | 149 | 357 | 90  | 6   | 269 |        |       |
| 66 | GTATA |           | Sue1_A_1  |  | 351 | 372 | 226 | 536 | 106 |        |       |

Supplemental Data. Henry et al. (2014), Plant Cell 10.1105/tpc.113.120626

|    |        |  | 3       |  |  |     |     |     |     |     |  |           |
|----|--------|--|---------|--|--|-----|-----|-----|-----|-----|--|-----------|
| 67 | GTCAA  |  | Syn-B5  |  |  | 164 | 240 | 617 | 59  | 37  |  |           |
| 68 | GTCCT  |  | Syn-B6  |  |  | 551 | 583 | 126 | 8   | 331 |  |           |
| 69 | GTCTG  |  | Syn-B7  |  |  | 532 | 61  | 571 | 211 |     |  |           |
| 70 | GTGAG  |  | Syn-B21 |  |  | 143 | 587 | 546 | 229 |     |  | Sue-1     |
| 71 | GTGGA  |  | Syn-B22 |  |  | 503 | 219 | 614 | 365 |     |  |           |
| 72 | GTTAT  |  | Syn-C6  |  |  | 332 | 627 | 108 | 124 |     |  |           |
| 73 | GTTCA  |  | Sue-2A  |  |  | 355 | 636 | 63  | 265 |     |  |           |
| 74 | GTTTC  |  | Syn-B10 |  |  | 323 | 184 | 321 | 336 |     |  |           |
| 75 | TAAGA  |  | Syn-B2  |  |  | 337 | 572 | 148 | 315 |     |  |           |
| 76 | TACTG  |  | Syn-B8  |  |  | 335 | 254 | 346 | 100 |     |  |           |
| 77 | TAGCT  |  | Syn-B11 |  |  | 638 | 570 | 525 | 91  |     |  |           |
| 78 | TATAG  |  | Syn-B12 |  |  | 303 | 334 | 89  | 290 |     |  |           |
| 79 | TATCC  |  | Syn-B23 |  |  | 613 | 588 | 77  | 563 |     |  | Ler       |
| 80 | TCATT  |  | Syn-B24 |  |  | 330 | 623 | 310 | 622 |     |  |           |
| 81 | TCCAG  |  | Syn-C3  |  |  | 641 | 356 | 169 | 114 |     |  |           |
| 82 | TCCCT  |  | Syn-F6  |  |  | 353 | 234 | 52  | 15  |     |  |           |
| 83 | TCGAC  |  | Syn-C2  |  |  | 170 | 259 | 23  | 322 |     |  |           |
| 84 | TCGCG  |  | Syn-C7  |  |  | 318 | 58  | 343 | 115 |     |  |           |
| 85 | TCGGA  |  | Syn-B1  |  |  | 359 | 280 | 564 | 66  |     |  |           |
| 86 | TGAAG  |  | Sue-5A  |  |  | 530 | 218 | 342 | 104 |     |  |           |
| 87 | TGACC  |  | Sue-7A  |  |  | 584 | 367 | 150 | 125 |     |  |           |
| 88 | TGATA  |  | Syn-F16 |  |  | 271 | 24  | 203 | 252 |     |  |           |
| 89 | TGGAT  |  | Sue-2B  |  |  | 640 | 377 | 180 | 171 |     |  |           |
| 90 | TGGTC  |  | Sue-2C  |  |  | 93  | 192 | 214 | 272 |     |  |           |
| 91 | TGTCTG |  | Sue-2D  |  |  | 181 | 231 | 502 | 162 |     |  |           |
| 92 | TGTGC  |  | Syn-B26 |  |  | 157 | 578 | 215 | 145 |     |  |           |
| 93 | TGTTT  |  | Sue-2E  |  |  | 194 | 190 | 39  | 511 |     |  |           |
| 94 | TTACT  |  | Sue-3A  |  |  | 542 | 528 | 99  | 179 |     |  | Car<br>e1 |
| 95 | TTAGG  |  | Sue-4A  |  |  | 500 | 208 | 554 | 230 |     |  | Sue-1     |
| 96 | TTCCC  |  | Sue-4B  |  |  | 556 | 590 | 644 | 123 |     |  |           |

P: parents. F2: Syn x Nat F2 individuals, SueSyn: Progeny of *A. suecica* (Sue) and synthetic allopolyploid (Syn) individuals.

**Supplemental Table 2 – Size of the genetic map**

| <b>Genome</b>      | <b>Chromosome</b>  | <b>Length<br/>(cM)</b> | <b># marker bins</b> |
|--------------------|--------------------|------------------------|----------------------|
| <i>A. thaliana</i> | 1                  | 110.2                  | 181                  |
|                    | 2                  | 69.4                   | 109                  |
|                    | 3                  | 88.1                   | 144                  |
|                    | 4                  | 72.8                   | 115                  |
|                    | 5                  | 102.5                  | 158                  |
| <i>A. arenosa</i>  | 1                  | 101.6                  | 123                  |
|                    | 2                  | 78.9                   | 68                   |
|                    | 3                  | 88.9                   | 115                  |
|                    | 4                  | 113.2                  | 102                  |
|                    | 5                  | 72.2                   | 77                   |
|                    | 6                  | 112.6                  | 122                  |
|                    | 7                  | 90.7                   | 96                   |
|                    | 8                  | 72                     | 67                   |
| Total              | <i>A. thaliana</i> | 443                    | 707                  |
|                    | <i>A. arenosa</i>  | 730.1                  | 770                  |

## Supplemental Methods 1 – SynxNat1\_Screen\_mpup.py

```

# Isabelle Henry, last modified June 2012
# UC Davis Genome Center
# This script takes an mpileup file as input (samtools) that contains allelic calls for Ler (A.thaliana), Care-1 (A. arenosa
4x),
# Sue (A. suecica) and the pooled F2 individuals. The mpileup comes from aligning each of these samples to the hybrid
reference
# genome (tair 9, five chromosomes + A. lyrata scaffolds 1 to 8). It then select specific positions based on the following
criteria:
# - covered at least 10 times in the F2 pooled data
# - covered at least once in Sue
# - If position on A. thaliana reference, it should not be covered in Care but be covered in the Ler
# - If position on A. lyrata referemce, it should be covered in Care but not in Ler
# - At least one basecall should be different from the reference in the F2 allele calls.

# This is just a quick way to reduce the size of the file prior to more elaborate filtering of potential marker positions.

import sys

from collections import defaultdict

mpup = open(sys.argv[1])
o = open(sys.argv[2], 'w')

counts = defaultdict(int)

for line in mpup:
    if line[0] == 'C':
        o.write(line)
    else:
        l = line.split()
        chrom = l[0]
        counts[chrom] += 1
        if l[12] != '0' and int(l[9]) > 9:
            if l[0][1] == 'l' and l[3] == '0' and l[6] != '0':
                if 'A' in l[10] or 'C' in l[10] or 'G' in l[10] or 'T' in l[10] or
'a' in l[10] or 'c' in l[10] or 'g' in l[10] or 't' in l[10] or '+' in l[10] or '*'
in l[10]:
                    o.write(line)
                    counts[str(chrom)+'kept'] += 1
            elif l[0][1] == 't' and l[3] != '0' and l[6] == '0':
                if 'A' in l[10] or 'C' in l[10] or 'G' in l[10] or 'T' in l[10] or
'a' in l[10] or 'c' in l[10] or 'g' in l[10] or 't' in l[10] or '+' in l[10] or '*'
in l[10]:
                    o.write(line)
                    counts[str(chrom)+'kept'] += 1
numbers = counts.keys()
numbers.sort

for x in numbers:
    print str(x) + '\t' + str(counts[x])

o.close()
mpup.close()

```

## Supplemental Methods 2 – SynxNat2\_Screen\_parsed\_mpup.py

```
# Isabelle Henry, last modified June 2012
# UC Davis Genome Center

# This script takes a parsed mpileup file as input (samtools) that contains allelic
calls for Ler (A.thaliana), Care-1 (A. arenosa 4x),
# Sue (A. suecica) and the pooled F2 individuals. The mpileup comes from aligning
each of these samples to the hybrid reference
# genome (tair 9, five chromosomes + A. lyrata scaffolds 1 to 8). It then select
specific positions based on the following criteria:
# 10 < F2 coverage < 300
# If position on A. thaliana reference:
#   - No coverage in Care
#   - Covered at least five times in Ler and Sue.
#   - The most common allele from Ler and Sue represent > 90% of their base calls
(not heterozygous) and are different from each other
#   - The same two alleles are represented in the F2, each represent at least 20% of
the base call for the pooled F2 population and represent at least 90% of the total
together
# Similar criteria apply for the A. arenosa positions.

import sys

from collections import defaultdict

mpup = open(sys.argv[1])
o = open(sys.argv[2], 'w')

counts = defaultdict(int)

for line in mpup:
    if line[0] == 'C':
        o.write(line)
    else:
        l = line.split()
        chrom = l[0]
        counts[chrom] += 1

##      0 = chr,
##      3 = SNP1Ler,
##      6 = CovLer,
##      7 = SNP1Care
##     10 = covCare,
##     12 = SNP2-F2,
##     14 = covF2,
##     15 = SNP1-Sue
##     18: cov Sue,

if l[18] != '.' and l[14] != '.' and l[12] != '.':
    if l[0][1] == 't' and l[6] != '.' and l[10] == '.':
        syn1 = l[3]
        syncov = int(l[6])
        syn = 'Ler'
    elif l[0][1] == 'l' and l[6] == '.' and l[10] != '.':
        syn1 = l[7]
        syncov = int(l[10])
```

```

        syn = 'Care'
    else:
        continue
    Sue1 = l[15]
    Suecov = int(l[18])
    F2cov = int(l[14])
    ## if thaliana position, Care has not be blank, Ler and Sue must be
    homozygous (>= 90%)
    if syn1.split('_')[0] != Sue1.split('_')[0]:
        if float(syn1.split('_')[1]) >= 90 and float(Sue1.split('_')[1])>=
90:
            if Suecov > 5 and syncov > 5 and 300 > F2cov > 10 and l[12] !=
'.':
                F2A1 = l[11].split('_')[0]
                F2A2 = l[12].split('_')[0]
                F2p1 = l[11].split('_')[1]
                F2p2 = l[12].split('_')[1]
                if float(F2p1) > 20 and float(F2p2) > 20 and float(F2p1) +
float(F2p2) > 90:
                    if syn1.split('_')[0] in [F2A1, F2A2] and
Sue1.split('_')[0] in [F2A1, F2A2]:
                        o.write(line)
                        counts[chrom+'yes'] += 1

numbers = counts.keys()
numbers.sort

for x in numbers:
    print str(x) + '\t' + str(counts[x])

o.close()
pmpup.close()

```



### Supplemental Methods 3 – SynxNat3\_CallAlleles.py

```
# Isabelle Henry, last modified June 2012
# UC Davis Genome Center

# This script takes a parsed mpileup file as input (samtools) that contains allelic
calls for Ler (A.thaliana), Care-1 (A. arenosa 4x),
# Sue (A. suecica) and the pooled F2 individuals. The mpileup comes from aligning
each of these samples to the hybrid reference
# genome (tair 9, five chromosomes + A. lyrata scaffolds 1 to 8).

# The mpileup file has already been screened for robust marker positions in the
previous steps.

# This script compared the alleles in the two parental genotypes and assign an allele
for the F2 individuals
# The criteria are as follows:
# - if only one allele type is found, and that allele corresponds to one of the two
parental allele, that allele is called.
# - if there are two allele types and the least frequent allele represents < 10% of
the calls, it is treated as if only the most common type was present
# - if there are two allele types and the least frequent allele represents > 10% of
the allele calls, and the two alleles
# correspond to the two parents, the allele is called Het.
# - in all other cases, the genotype is called "na"

# USAGE: SynxNat3_CallAlleles.py parsed_mpileup_marker.txt output.txt

import sys

pos = open(sys.argv[1])
o = open(sys.argv[2], 'w')

indices = []
totalcount = 0
odd1 = 0
odd2 = 0

for line in pos:
    l = line.split()
    if line[0] == 'C':
        count = 0
        header = 'Chrom\tPos\tRef\tSyn\tSue'
        for m in l:
            if m.split('-')[0] == 'Cov':
                indices.append(count)
                lib = m.split('-')[1]
                header += '\tSnptype-'+lib+'\tSNP1-'+lib+'\tSNP2-'+lib+'\tSNPCov-
'+lib+'\tAll-'+lib
                count += 1
            o.write(header+'\n')
            print indices
        else:
            if l[0][1] == 't':
                syn = l[3].split('_')[0]
                genome = 't'
            elif l[0][1] == 'l':
```

```

    syn = l[7].split('_')[0]
    genome = 'l'
    Sue = l[15].split('_')[0]
    text = l[0]+'\\t'+l[1]+'\\t'+l[2]+'\\t'+syn+'\\t'+Sue
    for i in indices:
        Cov = l[i]
        if Cov == '.':
            text += 5 * '\\t.'
        else:
            totalcount += 1
            snp1 = l[i-3]
            snp2 = l[i-2]
            snp3 = l[i-1]
            if snp3 != '.':
                Snptype = 3
            elif snp2 != '.':
                Snptype = 2
            else:
                Snptype = 1
            Snp1 = snp1.split('_')[0]
            if snp2 == '.':
                Snp2 = '.'
            elif float(snp2.split('_')[1]) <= 10:
                Snp2 = '.'
            else:
                Snp2 = snp2.split('_')[0]
            if (Snp1 == syn and Snp2 == Sue) or (Snp1 == Sue and Snp2 == syn):
                All = 'H'
            elif Snp2 != '.':
                All = '.'
                odd2 += 1
            elif Snp1 == syn:
                All = 'Y'
            elif Snp1 == Sue:
                All = 'S'
            else:
                All = '.'
                odd1 += 1
            text +=
            '\\t'+str(Snptype)+'\\t'+str(Snp1)+'\\t'+str(Snp2)+'\\t'+str(Cov)+'\\t'+All
            text += '\\n'
            o.write(text)

o.close()
pos.close()

print totalcount
print odd1
print odd2

```

#### Supplemental Methods 4 – SynxNat4\_Create\_MarkerBins.py

```
# Isabelle Henry, last modified June 2012
# UC Davis Genome Center

# This script takes a parsed mpileup file as input (samtools) that contains allelic
calls for Ler (A.thaliana), Care-1 (A. arenosa 4x),
# Sue (A. suecica) and the pooled F2 individuals. The mpileup comes from aligning
each of these samples to the hybrid reference
# genome (tair 9, five chromosomes + A. lyrata scaffolds 1 to 8).

# The mpileup file has already been screened for robust marker positions in the
previous steps.

# This script created MarkerBins, that encompass x (user define) adjacent markers and
calculated a mean genotype for each of the sample
# at each of the marker bins. Marker bins are non-overlapping and are positioned next
to each other along each of the chromosomes.

# For each marker bin, the start and end position (first and last marker in the bin)
are recorded, as well as the middle position.
# For each sample in the mpileup file, genotype at the marker bin is determined
according to the following criteria:
# - if less than 5 markers are genotyped within a window, the markerbin genotype is
called "na"
# - if at least 5 are present, an average genotype is derived using the following
rule: An S (Sue) allele counts for 1, a Y (synthetic) allele (Ler or care)
# counts for 0, a H (het) allele counts for 0.5
# - If the mean is < 0.05, the allele is called Y (synthetic)
# - If the mean is > 0.95, the allele is called S (Sue)
# - If 0.25<mean<0.75, the allele is called H (het).
# - Else, the allele is called "na"

# for each marker a mean % Sue is also calculated.

# a second file is also output that contains that actual mean % Sue for each window
and each sample

# USAGE: SynxNat4_Create_Markerbins.py parsed_mpup.txt output.txt windowsize

import sys

five = open(sys.argv[1])
o = open(sys.argv[2], 'w')
o2 = open(sys.argv[2].split('.')[0]+'_mean.txt', 'w')
window = int(sys.argv[3])

indices = []
libwin = {}
Pos = []

chrom = 'AtChr1'
N = 0

# processes the header line to determine the columns numbers and which samples
correspond to them
```

```

for line in five:
    l = line.split()
    if line[0] == 'C':
        count = 0
        header = 'Chrom\tPos\tBps'
        for m in l:
            if m.split('-')[0] == 'All':
                lib = m.split('-')[1]
                indices.append((count,lib))
                header += '\t'+lib
            count += 1
        header += '\t#Y\t#S\t#H\t#Low\t#High\t#na\tTotal\t%na\t%Sue\n'
        o.write(header)
        o2.write(header)
        print indices
        numlib = len(indices)
        print numlib
        for i in indices:
            libwin[i[1]] = []
#
else:
    Chrom = l[0]
    if N == 0:
        chrom = l[0]
    if Chrom == chrom and N < window:
        N += 1
        Pos.append(l[1])
        for i in indices:
            allele = l[i[0]]
            if allele == 'Y':
                libwin[i[1]].append(0)
            elif allele == 'S':
                libwin[i[1]].append(1)
            elif allele == 'H':
                libwin[i[1]].append(0.5)
    if N == window or Chrom != chrom:
        if N == window and len(Pos) != window:
            print 'PROBLEM'
            break
        countna = 0
        countzero = 0
        countone = 0
        counthalf = 0
        countlow = 0
        counthigh = 0
        region = int(Pos[-1])-int(Pos[0])
        MidPos = int(Pos[-1])-region/2
        output = str(chrom)+'\t'+str(MidPos)+'\t'+str(region)
        outputmean = str(chrom)+'\t'+str(MidPos)+'\t'+str(region)
        for j in indices:
            if len(libwin[j[1]]) < 5:
                output += '\t.'
                outputmean += '\t.'
                countna += 1
            else:
                average = float(sum(libwin[j[1]])) / len(libwin[j[1]])
                outputmean += '\t'+str(average)
                if average < 0.05:
                    output += '\t0'

```

```

        countzero += 1
    elif average > 0.95:
        output += '\t1'
        countone += 1
    elif 0.25 < average < 0.75:
        output += '\t0.5'
        counthalf +=1
    elif average <= 0.25:
        output += '\t0.25'
        countlow += 1
    elif average >= 0.75:
        output += '\t0.75'
        counthigh += 1
    else:
        print average
        break
    libwin[j[1]] = []
if N > 25:
    total = countzero + countone + counthalf + countlow + counthigh +
countna
    percna = 100.00 * countna / total
    SueRatio = (float(countone) + (float(counthalf) / 2.00)) /
float(countzero + countone + counthalf)
    output +=
'\t'+str(countzero)+'\t'+str(countone)+'\t'+str(counthalf)+'\t'+str(countlow)+'\t'+st
r(counthigh)+'\t'+str(countna)+'\t'+str(total)+'\t'+str(percna)+'\t'+str(SueRatio)+'\
n'
    print chrom
    N = 0
    Pos = []
    o.write(output)
    o2.write(outputmean+'\n')
else:
    N = 0
    Pos = []
o.close()
five.close()

```

### Supplemental Methods 5 – SynxNat5\_Imputation.py

```
# Isabelle Henry, last modified June 2012
# UC Davis Genome Center

# This script takes an r-qt1 genotype file, in which marker order has been optimized
and imputes missing genotypes
# as well as removed outlier genotypes.
# The criteria are as follows:
# For the middles of the chromosomes: the script looks for windows of maximum 15
markers, in which the first, last and one more are the same genotype
# it then looks for other genotypes. If there is more than one, it leaves the window
as is. If there is one or none, it fills the window
# with that genotype.

# For the beginning of the chromosomes: if the first three assigned markers agree,
are less than 14 markers apart, and they are less than 14 markers away from the
beginning,
# then the first unassigned markers get filled with the same genotype as the first
three assigned markers

# For the end of the chromosomes: if the window is maximum 10 markers long, the first
marker of the window and the one before that are consistent and
# and there is no other call in the window, the window is filled with that marker

# USAGE: SynxNat5_Imputation.py GenotypeFile output.txt pos
# if genetic is used, the script assumes the presence of a third header line
containing the position of the markers

import sys

bins = open(sys.argv[1])
o = open(sys.argv[2], 'w')

first = []

# marker name lines

markers = bins.readline()
m2 = markers.split('\n')[0].split(',')
print len(m2)
o.write(markers)

chroms = bins.next()
ch = chroms.split('\n')[0].split(',')
print len(ch)
o.write(chroms)

# makes a list of the first column of each chromosome
prevc = '.'
count = 1
for c in ch[1:]:
    if c != prevc:
        first.append(count)
    prevc = c
    count += 1
```

```

print first

# need to add the first column of the next chromosome to identify the end of the last
one

first.append(count)

print first

# write the genetic distance line
if 'pos' in sys.argv:
    line = bins.next()
    o.write(line)

## window function looks for the second instance of the same markers in a window of
15 genotypes
## it returns the position of the third instance of the same marker as the first in
that window
## a value of 2 means that the first three are identical. Can go on to the next
marker
## > 2 means that there are three identical markers but there is also at least one
other
## 0 means that there is not two more markers identical to the first one in that
window

def window(marker, bigwin):
    count = 0
    second = []
    for g in bigwin:
        if g == marker:
            second.append(count)
            count += 1
        else:
            count += 1
    if len(second) > 2:
        return (second[2])
    else:
        return (0)

## going through each F2 individual

onec = zeroc = halfc = nac = 0

for mine in bins:
    m = mine.split('\n')[0].split(',')
    lib = str(m[0])
    geno = {}
    c = 0
    for chrom in first[:-1]:
        geno[chrom] = m[first[c]:first[c+1]]
        c += 1
    Chromo = geno.keys()
    Chromo.sort()
    for n in Chromo:
        b = 'begin'
        col = 0
        ending = len(geno[n])
        for w in range (0,ending):
            marker = geno[n][w]

```

```

if marker == 'YY' or marker == 'YS' or marker == 'SS':
## to fill in the blanks at the beginning of the chromosomes
    if b == 'begin':
        FIRST = 'no'
        if col < 14:
            First = col
            b = 'middle'
        else:
            b = 'middle'
        bigwin = geno[n][col:col+15]

## to make smaller windows at the end of the chromosomes
    elif col > len(geno[n])-15:
        bigwin = geno[n][col:]
        b = 'end'
## for the middle
    else:
        bigwin = geno[n][col:col+15]

        if len(bigwin) > 2:
            end = window(marker, bigwin)
            if end > 2:
                win = geno[n][col:col+end+1]
                if win[0] != win[-1] or win[0] != marker or win.count(marker)
!= 3:
                    break
                else:
                    All = win.count('SS')+ win.count('YY')+win.count('YS')
                    others = All - win.count(marker)

                    if others < 2:
                        FIRST = 'yes'
                        for d in range(0,len(win)):
                            x = win[d]
                            if x == marker:
                                continue
                            elif x == 'SS':
                                onec += 1
                                win[d] = marker
                            elif x == 'YS':
                                halfc += 1
                                win[d] = marker
                            elif x == 'YY':
                                zeroc += 1
                                win[d] = marker
                            elif x == '-':
                                nac += 1
                                win[d] = marker
                            else:
                                print "invalid value"
                                print x
                                break
                        if col == First:
                            for z in range(0,First):
                                geno[n][z] = marker
                            geno[n][col:col+end+1] = win

## for filling in the end if there are no more markers identical to the first one
    elif end == 0 and col > (len(geno[n]) - 10):

```



```

        win = geno[n][col-1:len(geno[n])]
        if win.count('SS') + win.count('YS') + win.count('YY') -
win.count(marker) == 0 and win.count(marker) > 1:
            for x in range (col,len(geno[n])):
                geno[n][x] = marker

## for filling in the very beignning of the chromosome
        elif col == First:
            if end == 2:
                for z in range(0,First):
                    geno[n][z] = marker
            elif end>2 and FIRST == 'yes':
                for z in range(0,First):
                    geno[n][z] = marker

## to remove an outlier stuck in a crossing-over (not otherwise removed)
        elif end == 0 and bigwin.count('SS') > 0 and bigwin.count('YY') >
0 and bigwin.count('YS') > 0:
            oneb = bigwin.count('SS')
            zerob = bigwin.count('YY')
            halfb = bigwin.count('YS')
            if marker == 'SS' and zerob < halfb and zerob < 5:
                markerb = 'YY'
            elif marker == 'SS' and halfb < zerob and halfb < 5:
                markerb = 'YS'
            elif marker == 'YY' and halfb < oneb and halfb < 5:
                markerb = 'YS'
            elif marker == 'YY' and halfb > oneb and oneb < 5:
                markerb = 'SS'
            elif marker == 'YS' and zerob < oneb and zerob < 5:
                markerb = 'YY'
            elif marker == 'YS' and oneb < zerob and oneb < 5:
                markerb = 'SS'
            else:
                markerb = '-'
            for i in range (0, len(bigwin)):
                if bigwin[i] == markerb:
                    bigwin[i] = '-'
            if b == 'middle':
                geno[n][col:col+15] = bigwin
            elif b == 'end':
                geno[n][col:] = bigwin

        col += 1

## printing the new genotypes and calculating the percentages of each genotype
        formatter = ''

        for p in range (1,first[0]):
            formatter += ','+m[p]
        ##         if m[p] == '' or m[p] == '.':
        ##             m[p] = 'NA'
        ##         formatterqtl += ','+m[p]

        Syn = Sue = na = het = 0
        for Chrom in Chromo:
            for j in geno[Chrom]:
                if j == 'YY':
                    Syn += 1
                elif j == 'SS':

```

```
        Sue += 1
    elif j == '-':
        na += 1
    elif j == 'YS':
        het += 1
    else:
        print "invalid genotype 2"
        print j
        break
    formatter += ','+str(j)
total = Syn + Sue + het + na
data = Syn + Sue + het
if Syn + Sue + het > 0:
    PerSue = 100 * (Sue + het/2) / (Sue + het + Syn)
    PerSyn = 100 * (Syn) / (Sue + het + Syn)
else:
    PerSue = '.'
    PerSyn = '.'
if PerSyn > 1:

o.write(lib+formatter+','+str(Sue)+','+str(het)+','+str(Syn)+','+str(na)+','+str(total)+','+str(data)+','+str(PerSue)+',F2\n')
    else:

o.write(lib+formatter+','+str(Sue)+','+str(het)+','+str(Syn)+','+str(na)+','+str(total)+','+str(data)+','+str(PerSue)+',F1xSue\n')
    print "finished" + str(lib)

o.close()
bins.close()
print str(zero)
print str(half)
print str(one)
print str(nine)
```
